# Supplementary material
Source: publisher figshare collection journal article supplement (https://sage.figshare.com/ndownloader/files/13247588)
Supplement: Supplementary file 1 [file 13247588]

SUPPLEMENTARY INFORMATION

For

Development of a bacterial macroarray for the rapid screening of targeted antibody-secreted hybridomas

Jie Lia 1, XuZhao Zhaia 1, Chengchao Dinga, Yali Liub, Qingli Donga, Dongpo Xua, Xiang Wanga, Jingxuan Qiua, Qi Zhanga *, Jing Pana *, Qing Liua, c*

aSchool of Medical Instrument and Food Engineering, University of Shanghai for Science and Technology, Shanghai 200093, PR China; bLanzhou University Second Hospital Lanzhou 730030, China; cLaboratory for Marine Fisheries Science and Food Production Processes, Qingdao National Laboratory for Marine Science and Technology, Qingdao 266071, PR China

Table 1. 56 Bacterial strains used for the preparation of bacterial macroarray.

| Number | Strains | Strain ID |
| --- | --- | --- |
| 1 | *Cronobacter sakazakii* | ATCC 29004 |
| 2 | *Cronobacter sakazakii* | ATCC 29544 |
| 3 | *Cronobacter sakazakii* | ATCC 12868 |
| 4 | *Enterobacter aerogenes* | ATCC 13048 |
| 5 | [*Salmonella*](http://cn.bing.com/dict/clientsearch?mkt=zh-CN&setLang=zh&form=BDVEHC&ClientVer=BDDTV3.5.0.4311&q=%E7%94%B2%E5%9E%8B%E5%89%AF%E4%BC%A4%E5%AF%92%E6%B2%99%E9%97%A8%E6%B0%8F%E8%8F%8C)[*paratyphi*](http://cn.bing.com/dict/clientsearch?mkt=zh-CN&setLang=zh&form=BDVEHC&ClientVer=BDDTV3.5.0.4311&q=%E7%94%B2%E5%9E%8B%E5%89%AF%E4%BC%A4%E5%AF%92%E6%B2%99%E9%97%A8%E6%B0%8F%E8%8F%8C) *A* | CMCC(B) 50093 |
| 6 | [*Salmonella*](http://cn.bing.com/dict/clientsearch?mkt=zh-CN&setLang=zh&form=BDVEHC&ClientVer=BDDTV3.5.0.4311&q=%E7%94%B2%E5%9E%8B%E5%89%AF%E4%BC%A4%E5%AF%92%E6%B2%99%E9%97%A8%E6%B0%8F%E8%8F%8C)[*paratygphi*](http://cn.bing.com/dict/clientsearch?mkt=zh-CN&setLang=zh&form=BDVEHC&ClientVer=BDDTV3.5.0.4311&q=%E7%94%B2%E5%9E%8B%E5%89%AF%E4%BC%A4%E5%AF%92%E6%B2%99%E9%97%A8%E6%B0%8F%E8%8F%8C) *A* | IQCC 30537 |
| 7 | [*Salmonella*](http://cn.bing.com/dict/clientsearch?mkt=zh-CN&setLang=zh&form=BDVEHC&ClientVer=BDDTV3.5.0.4311&q=%E7%94%B2%E5%9E%8B%E5%89%AF%E4%BC%A4%E5%AF%92%E6%B2%99%E9%97%A8%E6%B0%8F%E8%8F%8C)[*paratyphi*](http://cn.bing.com/dict/clientsearch?mkt=zh-CN&setLang=zh&form=BDVEHC&ClientVer=BDDTV3.5.0.4311&q=%E7%94%B2%E5%9E%8B%E5%89%AF%E4%BC%A4%E5%AF%92%E6%B2%99%E9%97%A8%E6%B0%8F%E8%8F%8C) *A* | IQCC 30538 |
| 8 | [*Salmonella*](http://cn.bing.com/dict/clientsearch?mkt=zh-CN&setLang=zh&form=BDVEHC&ClientVer=BDDTV3.5.0.4311&q=%E7%94%B2%E5%9E%8B%E5%89%AF%E4%BC%A4%E5%AF%92%E6%B2%99%E9%97%A8%E6%B0%8F%E8%8F%8C)[*paratyphi*](http://cn.bing.com/dict/clientsearch?mkt=zh-CN&setLang=zh&form=BDVEHC&ClientVer=BDDTV3.5.0.4311&q=%E7%94%B2%E5%9E%8B%E5%89%AF%E4%BC%A4%E5%AF%92%E6%B2%99%E9%97%A8%E6%B0%8F%E8%8F%8C) *A* | IQCC 10508 |
| 9 | [*Salmonella*](http://cn.bing.com/dict/clientsearch?mkt=zh-CN&setLang=zh&form=BDVEHC&ClientVer=BDDTV3.5.0.4311&q=%E7%94%B2%E5%9E%8B%E5%89%AF%E4%BC%A4%E5%AF%92%E6%B2%99%E9%97%A8%E6%B0%8F%E8%8F%8C)[*paratyphi*](http://cn.bing.com/dict/clientsearch?mkt=zh-CN&setLang=zh&form=BDVEHC&ClientVer=BDDTV3.5.0.4311&q=%E7%94%B2%E5%9E%8B%E5%89%AF%E4%BC%A4%E5%AF%92%E6%B2%99%E9%97%A8%E6%B0%8F%E8%8F%8C) *A* | IQCC 10527 |
| 10 | [*Salmonella*](http://cn.bing.com/dict/clientsearch?mkt=zh-CN&setLang=zh&form=BDVEHC&ClientVer=BDDTV3.5.0.4311&q=%E7%94%B2%E5%9E%8B%E5%89%AF%E4%BC%A4%E5%AF%92%E6%B2%99%E9%97%A8%E6%B0%8F%E8%8F%8C)[*paratyphi*](http://cn.bing.com/dict/clientsearch?mkt=zh-CN&setLang=zh&form=BDVEHC&ClientVer=BDDTV3.5.0.4311&q=%E7%94%B2%E5%9E%8B%E5%89%AF%E4%BC%A4%E5%AF%92%E6%B2%99%E9%97%A8%E6%B0%8F%E8%8F%8C) *B* | CMCC(B) 50094 |
| 11 | [*Salmonella*](http://cn.bing.com/dict/clientsearch?mkt=zh-CN&setLang=zh&form=BDVEHC&ClientVer=BDDTV3.5.0.4311&q=%E7%94%B2%E5%9E%8B%E5%89%AF%E4%BC%A4%E5%AF%92%E6%B2%99%E9%97%A8%E6%B0%8F%E8%8F%8C)[*paratyphi*](http://cn.bing.com/dict/clientsearch?mkt=zh-CN&setLang=zh&form=BDVEHC&ClientVer=BDDTV3.5.0.4311&q=%E7%94%B2%E5%9E%8B%E5%89%AF%E4%BC%A4%E5%AF%92%E6%B2%99%E9%97%A8%E6%B0%8F%E8%8F%8C) *B* | IQCC 10504 |
| 12 | [*Salmonella*](http://cn.bing.com/dict/clientsearch?mkt=zh-CN&setLang=zh&form=BDVEHC&ClientVer=BDDTV3.5.0.4311&q=%E7%94%B2%E5%9E%8B%E5%89%AF%E4%BC%A4%E5%AF%92%E6%B2%99%E9%97%A8%E6%B0%8F%E8%8F%8C)[*paratyphi*](http://cn.bing.com/dict/clientsearch?mkt=zh-CN&setLang=zh&form=BDVEHC&ClientVer=BDDTV3.5.0.4311&q=%E7%94%B2%E5%9E%8B%E5%89%AF%E4%BC%A4%E5%AF%92%E6%B2%99%E9%97%A8%E6%B0%8F%E8%8F%8C) *C* | CICC 21512 |
| 13 | *Klebsiella pneumoniae* | CMCC(B)46117 |
| 14 | *Proteus vulgaris* | CMCC(B)49027 |
| 15 | *Escherichia coli O157:H7* | ATCC 43889 |
| 16 | *Escherichia coli O157:H7* | ATCC 43895 |
| 17 | *Escherichia coli O100* | ATCC 18684 |
| 18 | *Escherichia coli O91* | ATCC HG15 |
| 19 | *Escherichia coli* | CMCC(B) 44102 |
| 20 | *Escherichia coli* | ATCC 25922 |
| 21 | *Escherichia coli* | ATCC 8739 |
| 22 | *Escherichia coli O149* | ATCC 18685 |
| 23 | *Shigella flexneri* | ATCC 12022 |
| 24 | *Shigella flexneri* | CMCC 51572 |
| 25 | *Shigella dysenteriae* | ATCC 9207 |
| 26 | Shigella dysenteriae | CMCC 51346 |
| 27 | *Shigella sonnei* | CMCC 51592 |
| 28 | [*Shigella*](http://cn.bing.com/dict/clientsearch?mkt=zh-CN&setLang=zh&form=BDVEHC&ClientVer=BDDTV3.5.0.4311&q=%E7%97%A2%E7%96%BE%E5%BF%97%E8%B4%BA%E6%B0%8F%E8%8F%8C)[*dysenteriae*](http://cn.bing.com/dict/clientsearch?mkt=zh-CN&setLang=zh&form=BDVEHC&ClientVer=BDDTV3.5.0.4311&q=%E7%97%A2%E7%96%BE%E5%BF%97%E8%B4%BA%E6%B0%8F%E8%8F%8C) | CMCC(B) 51105 |
| 29 | *Bacillus cereus* | CMCC(B) 63303 |
| 30 | *Yersinia enterocolitica* | ATCC 23715 |
| 31 | *Listeria monocytogenes* | ATCC 43251 |
| 32 | *Listeria monocytogenes* | ATCC 19114 |
| 33 | *Listeria monocytogenes* | ATCC 19115 |
| 34 | *Listeria monocytogenes* | ATCC 19116 |
| 35 | *Listeria monocytogenes* | ATCC 19117 |
| 36 | *Listeria monocytogenes* | ATCC 19118 |
| 37 | *Listeria monocytogenes* | ATCC 13912 |
| 38 | *Vibrio parahaemolyticus* | ATCC 33847 |
| 39 | *Vibrio parahaemolyticus* | ATCC 17802 |
| 40 | *Vibrio vulnificus* | ATCC 27562 |
| 41 | *Salmonella typhimurium* | ATCC 14028 |
| 42 | *Salmonella typhimurium* | CMCC(B) 50115 |
| 43 | *Salmonella typhimurium* | CICC 22956 |
| 44 | *Salmonella enteritidis* | ATCC 13076 |
| 45 | *Salmonella Choleraesuis* | CICC 21493 |
| 46 | *Salmonella anatum* | IQCC 10509 |
| 47 | *Salmonella aberdeen* | IQCC 10511 |
| 48 | *Salmonella bovis morbificans* | IQCC 10510 |
| 49 | *Salmonella dublin* | IQCC 10523 |
| 50 | *Salmonella Heidelberg* | IQCC 10521 |
| 51 | *Salmonella Kentucky* | IQCC 10530 |
| 52 | *Salmonella Saint-paul* | IQCC 10529 |
| 53 | *Salmonella thuringiensis* | IQCC 10532 |
| 54 | *Salmonella gallinarum* | IQCC 10525 |
| 55 | *Salmonella typhi* | CMCC(B)50071 |
| 56 | *Campylobacter jejuni* | CICC 22937 |
